# Supplementary material
Source: publisher figshare collection journal article supplement (https://frontiersin.figshare.com/ndownloader/files/23335649)
Supplement: Supplementary file [file 23335649]

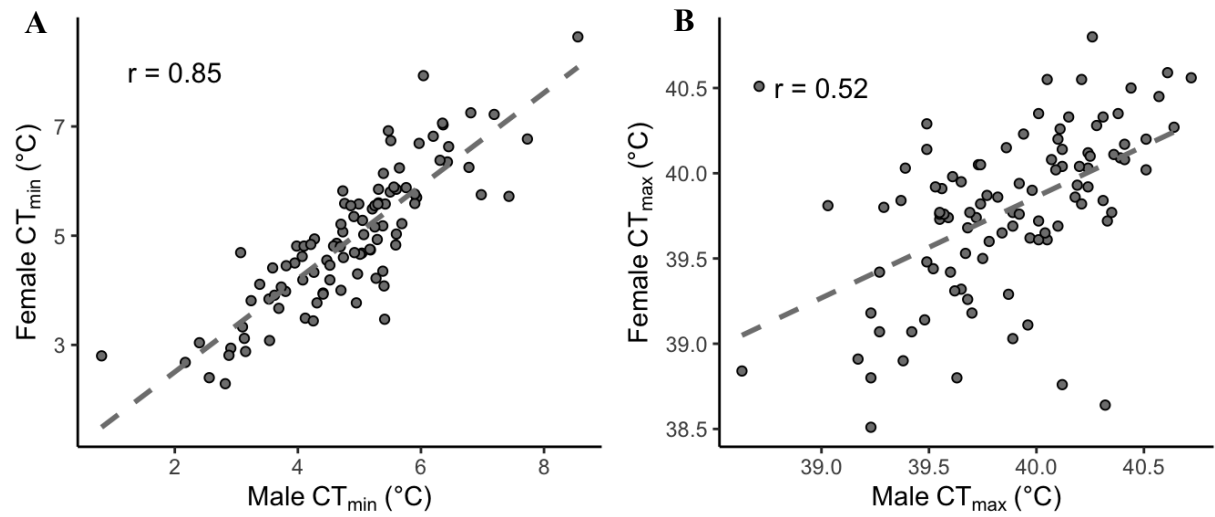

**Supplementary Figure 2. Correlation of thermal limits across sexes. (A)  $CT_{min}$  and (B)  $CT_{max}$ .**
